# Supplementary material for: Transcriptomic Analysis of Four Cerianthid (Cnidaria, Ceriantharia) Venoms
Source: MDPI journal article supplement (doi:10.3390/md18080413), 2020-08-05
Supplement: s1 [file s1]

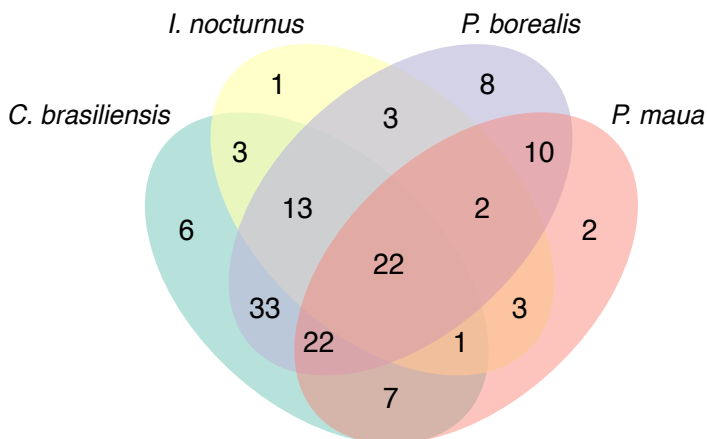

| Species                | # of proteins,<br>(in cluster) | # of proteins,<br>(singletons) |
|------------------------|--------------------------------|--------------------------------|
| <i>C. brasiliensis</i> | 107                            | 27                             |
| <i>I. nocturnus</i>    | 48                             | 13                             |
| <i>P. borealis</i>     | 113                            | 43                             |
| <i>P. maua.</i>        | 69                             | 18                             |
