# Supplementary figures and images for: Transcriptomic Analysis of Four Cerianthid (Cnidaria, Ceriantharia) Venoms
Source: MDPI journal article supplement (doi:10.3390/md18080413), 2020-08-05

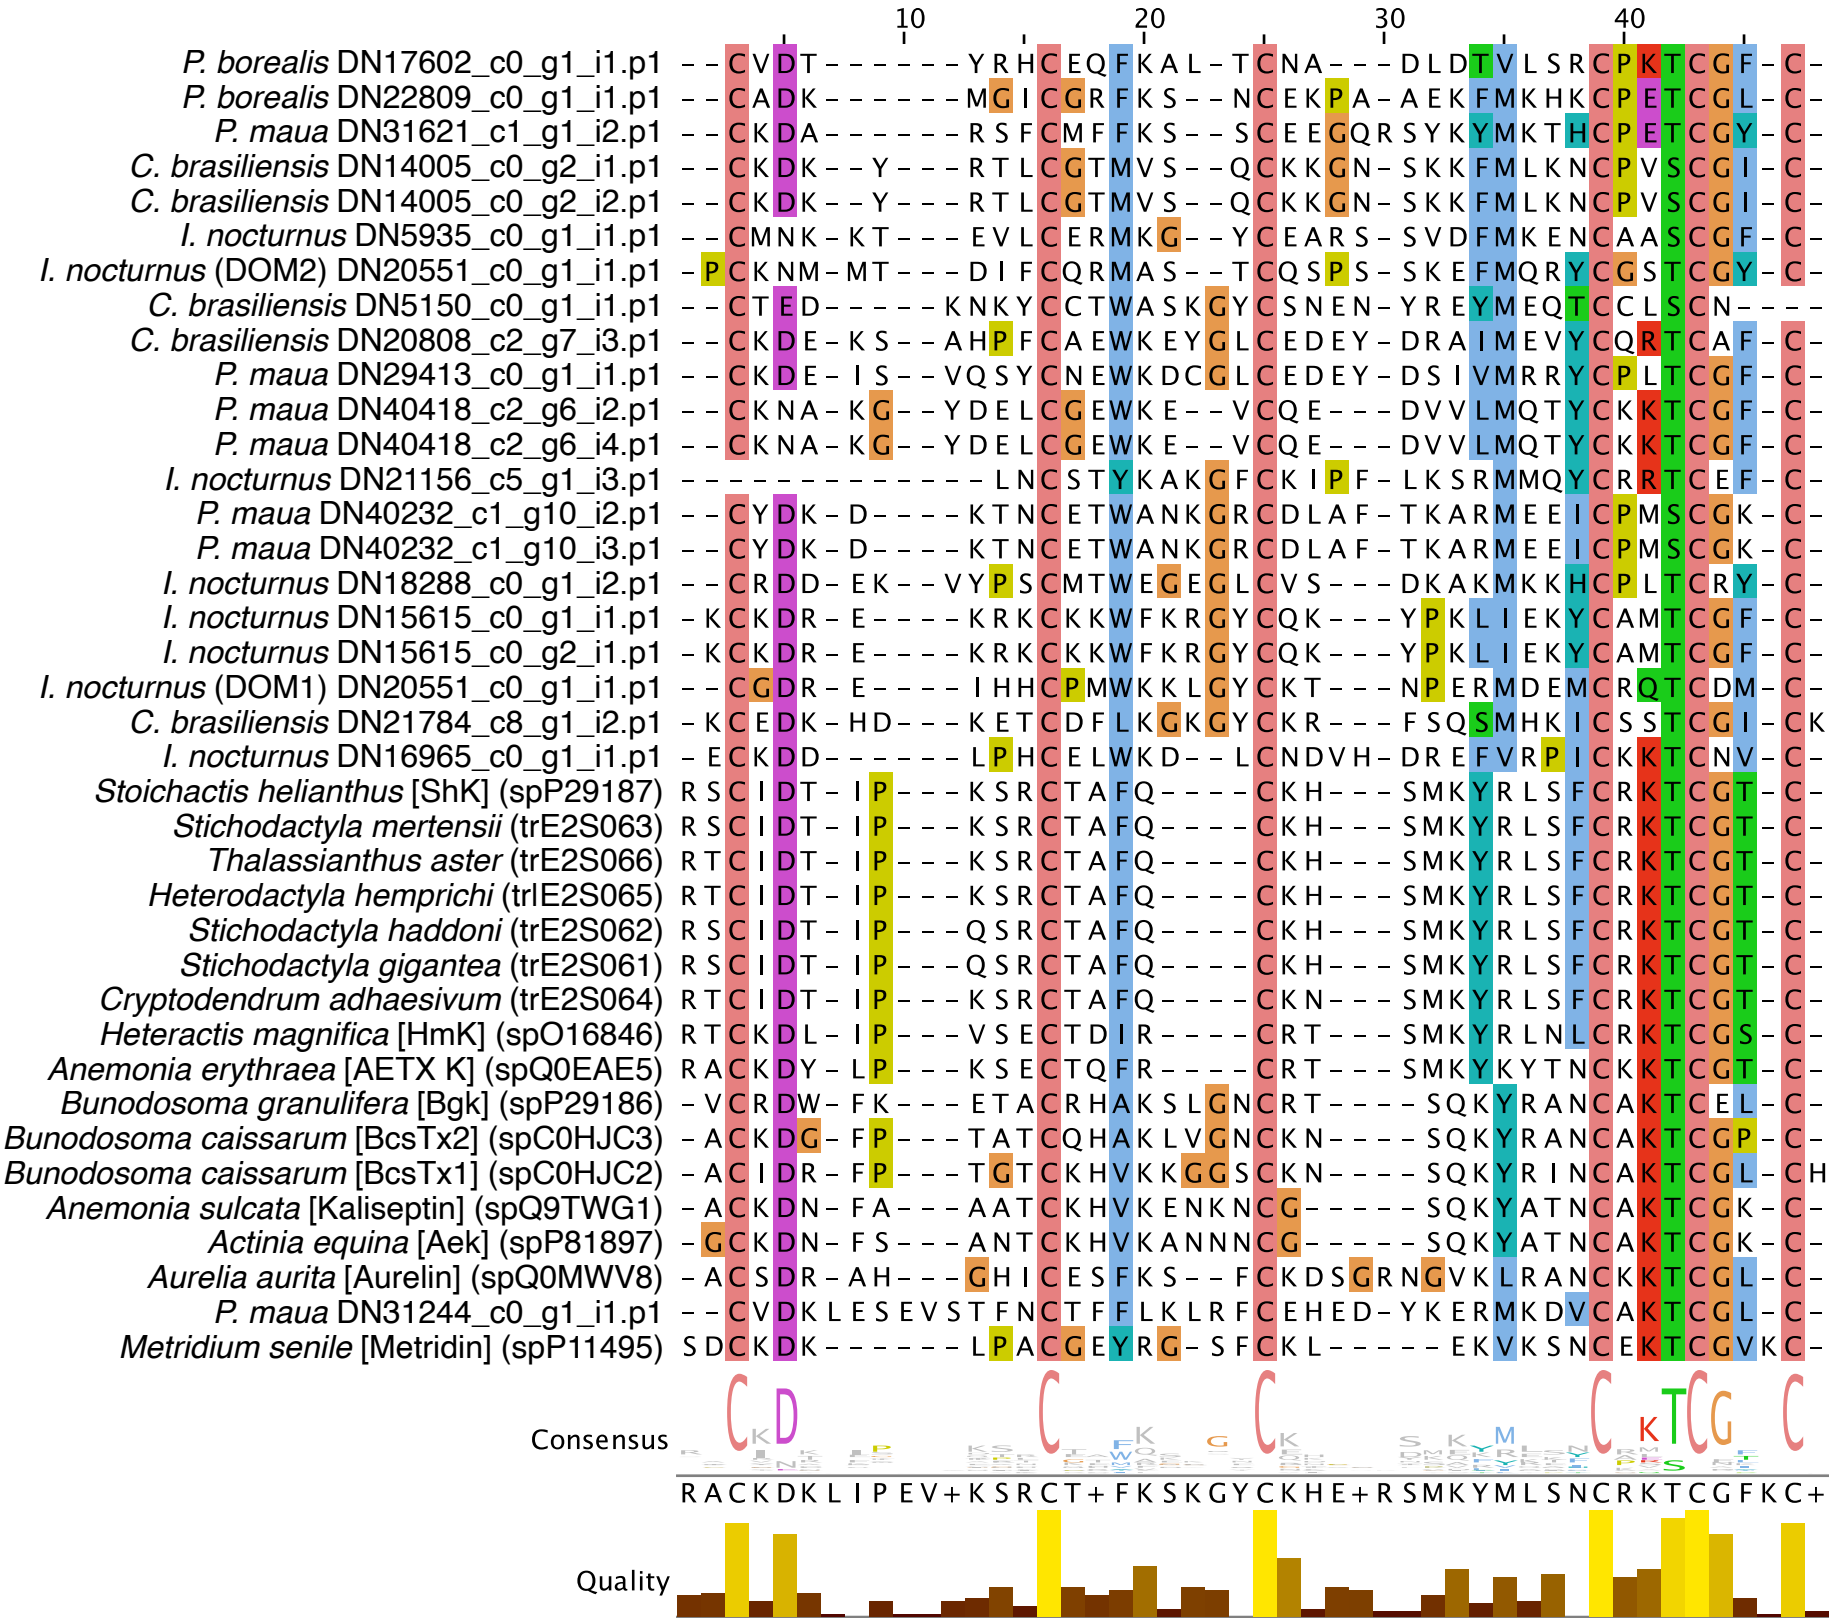

Supplement: s1 [file s1]

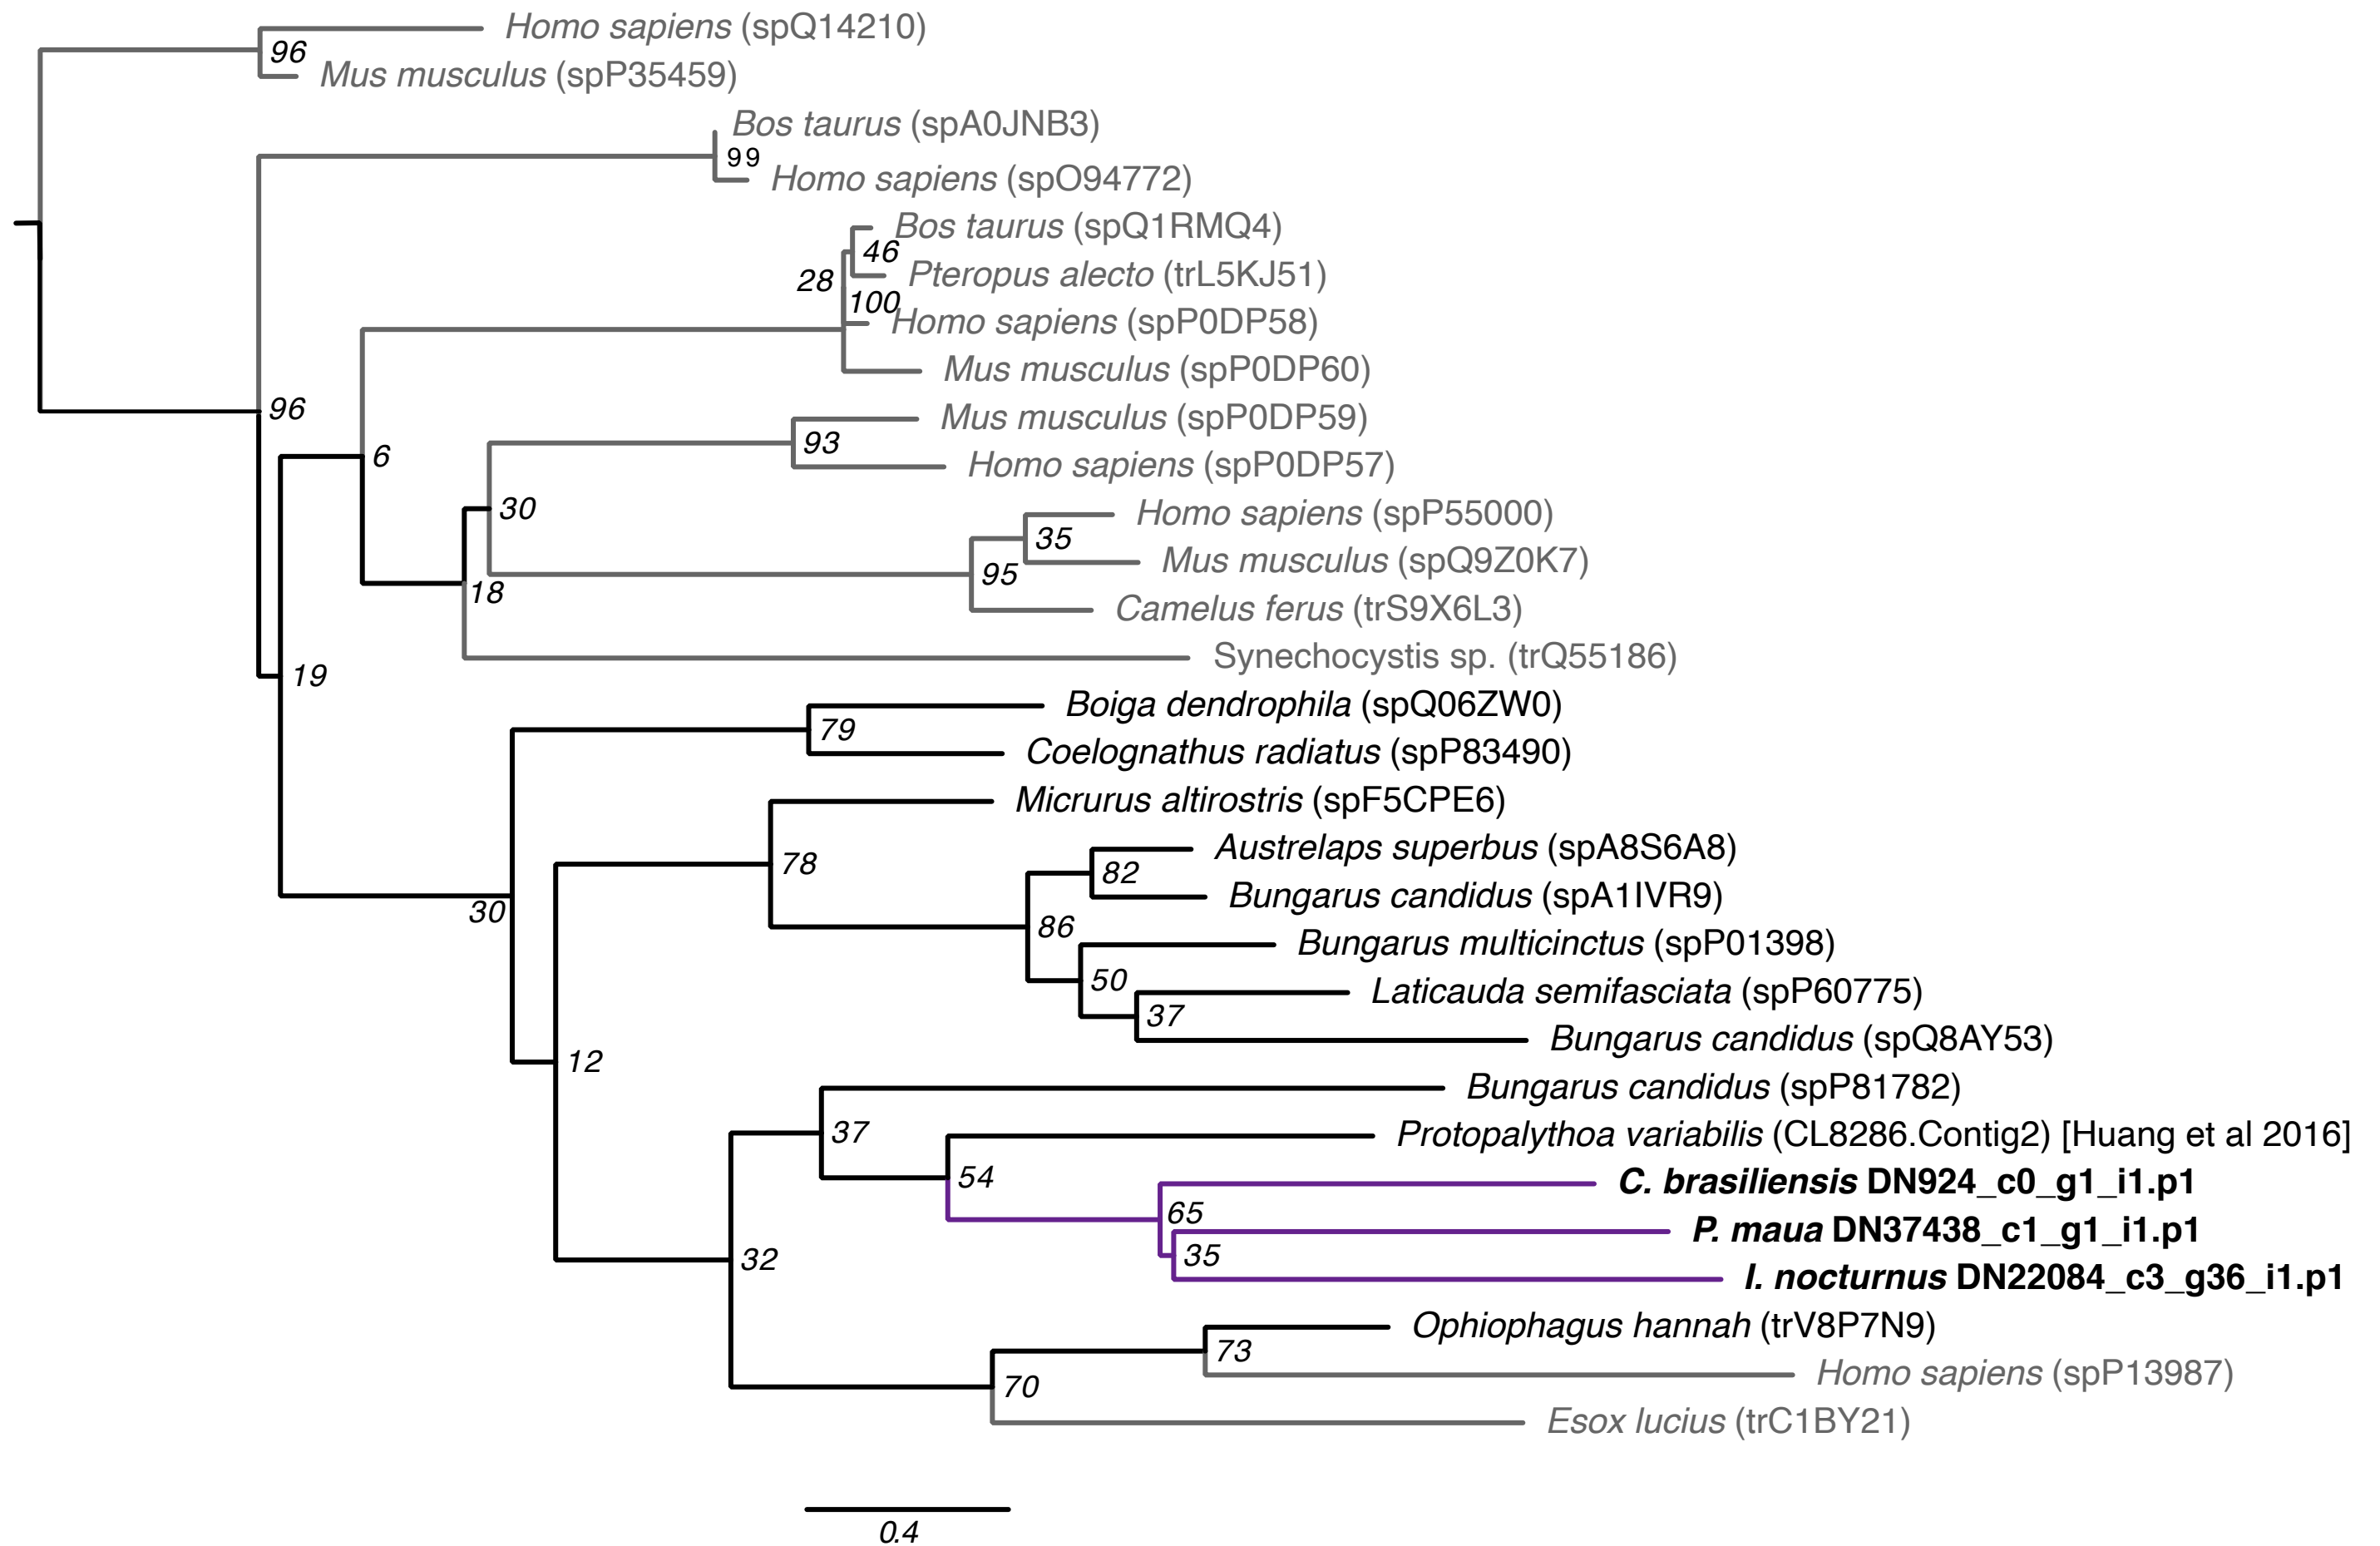

Supplement: s1 [file s1]

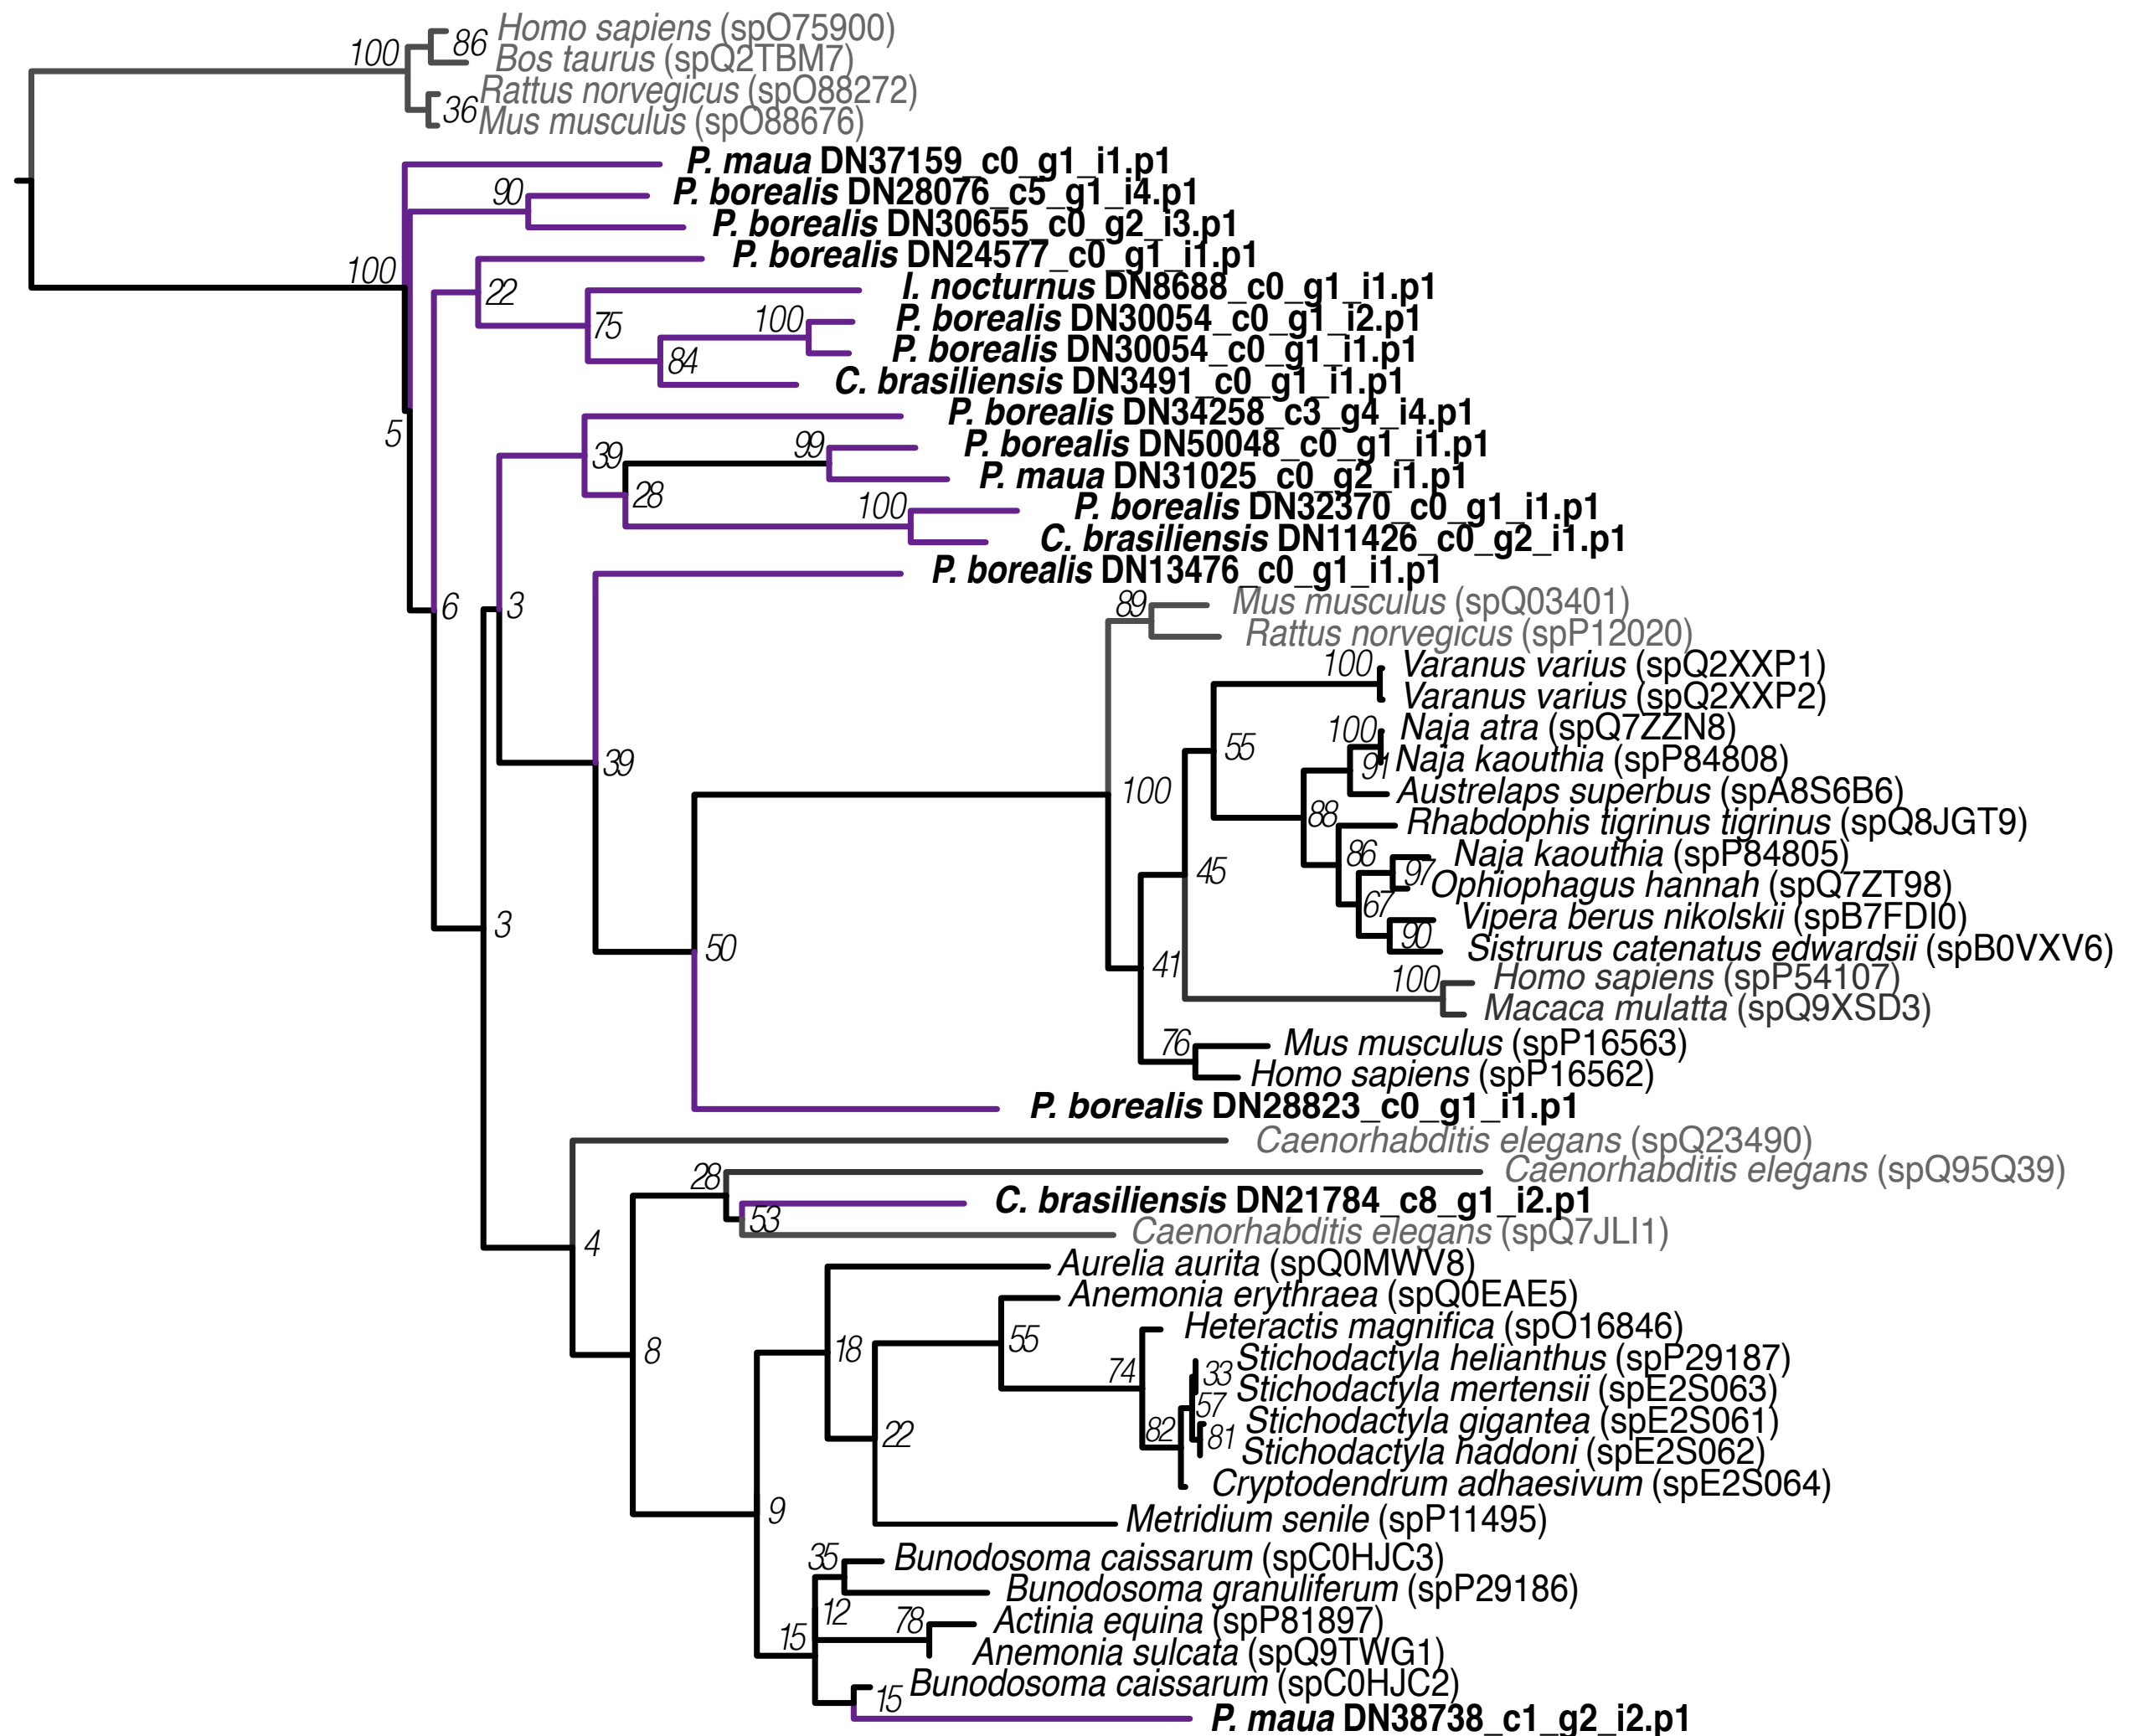

0.5

Supplement: s1 [file s1]

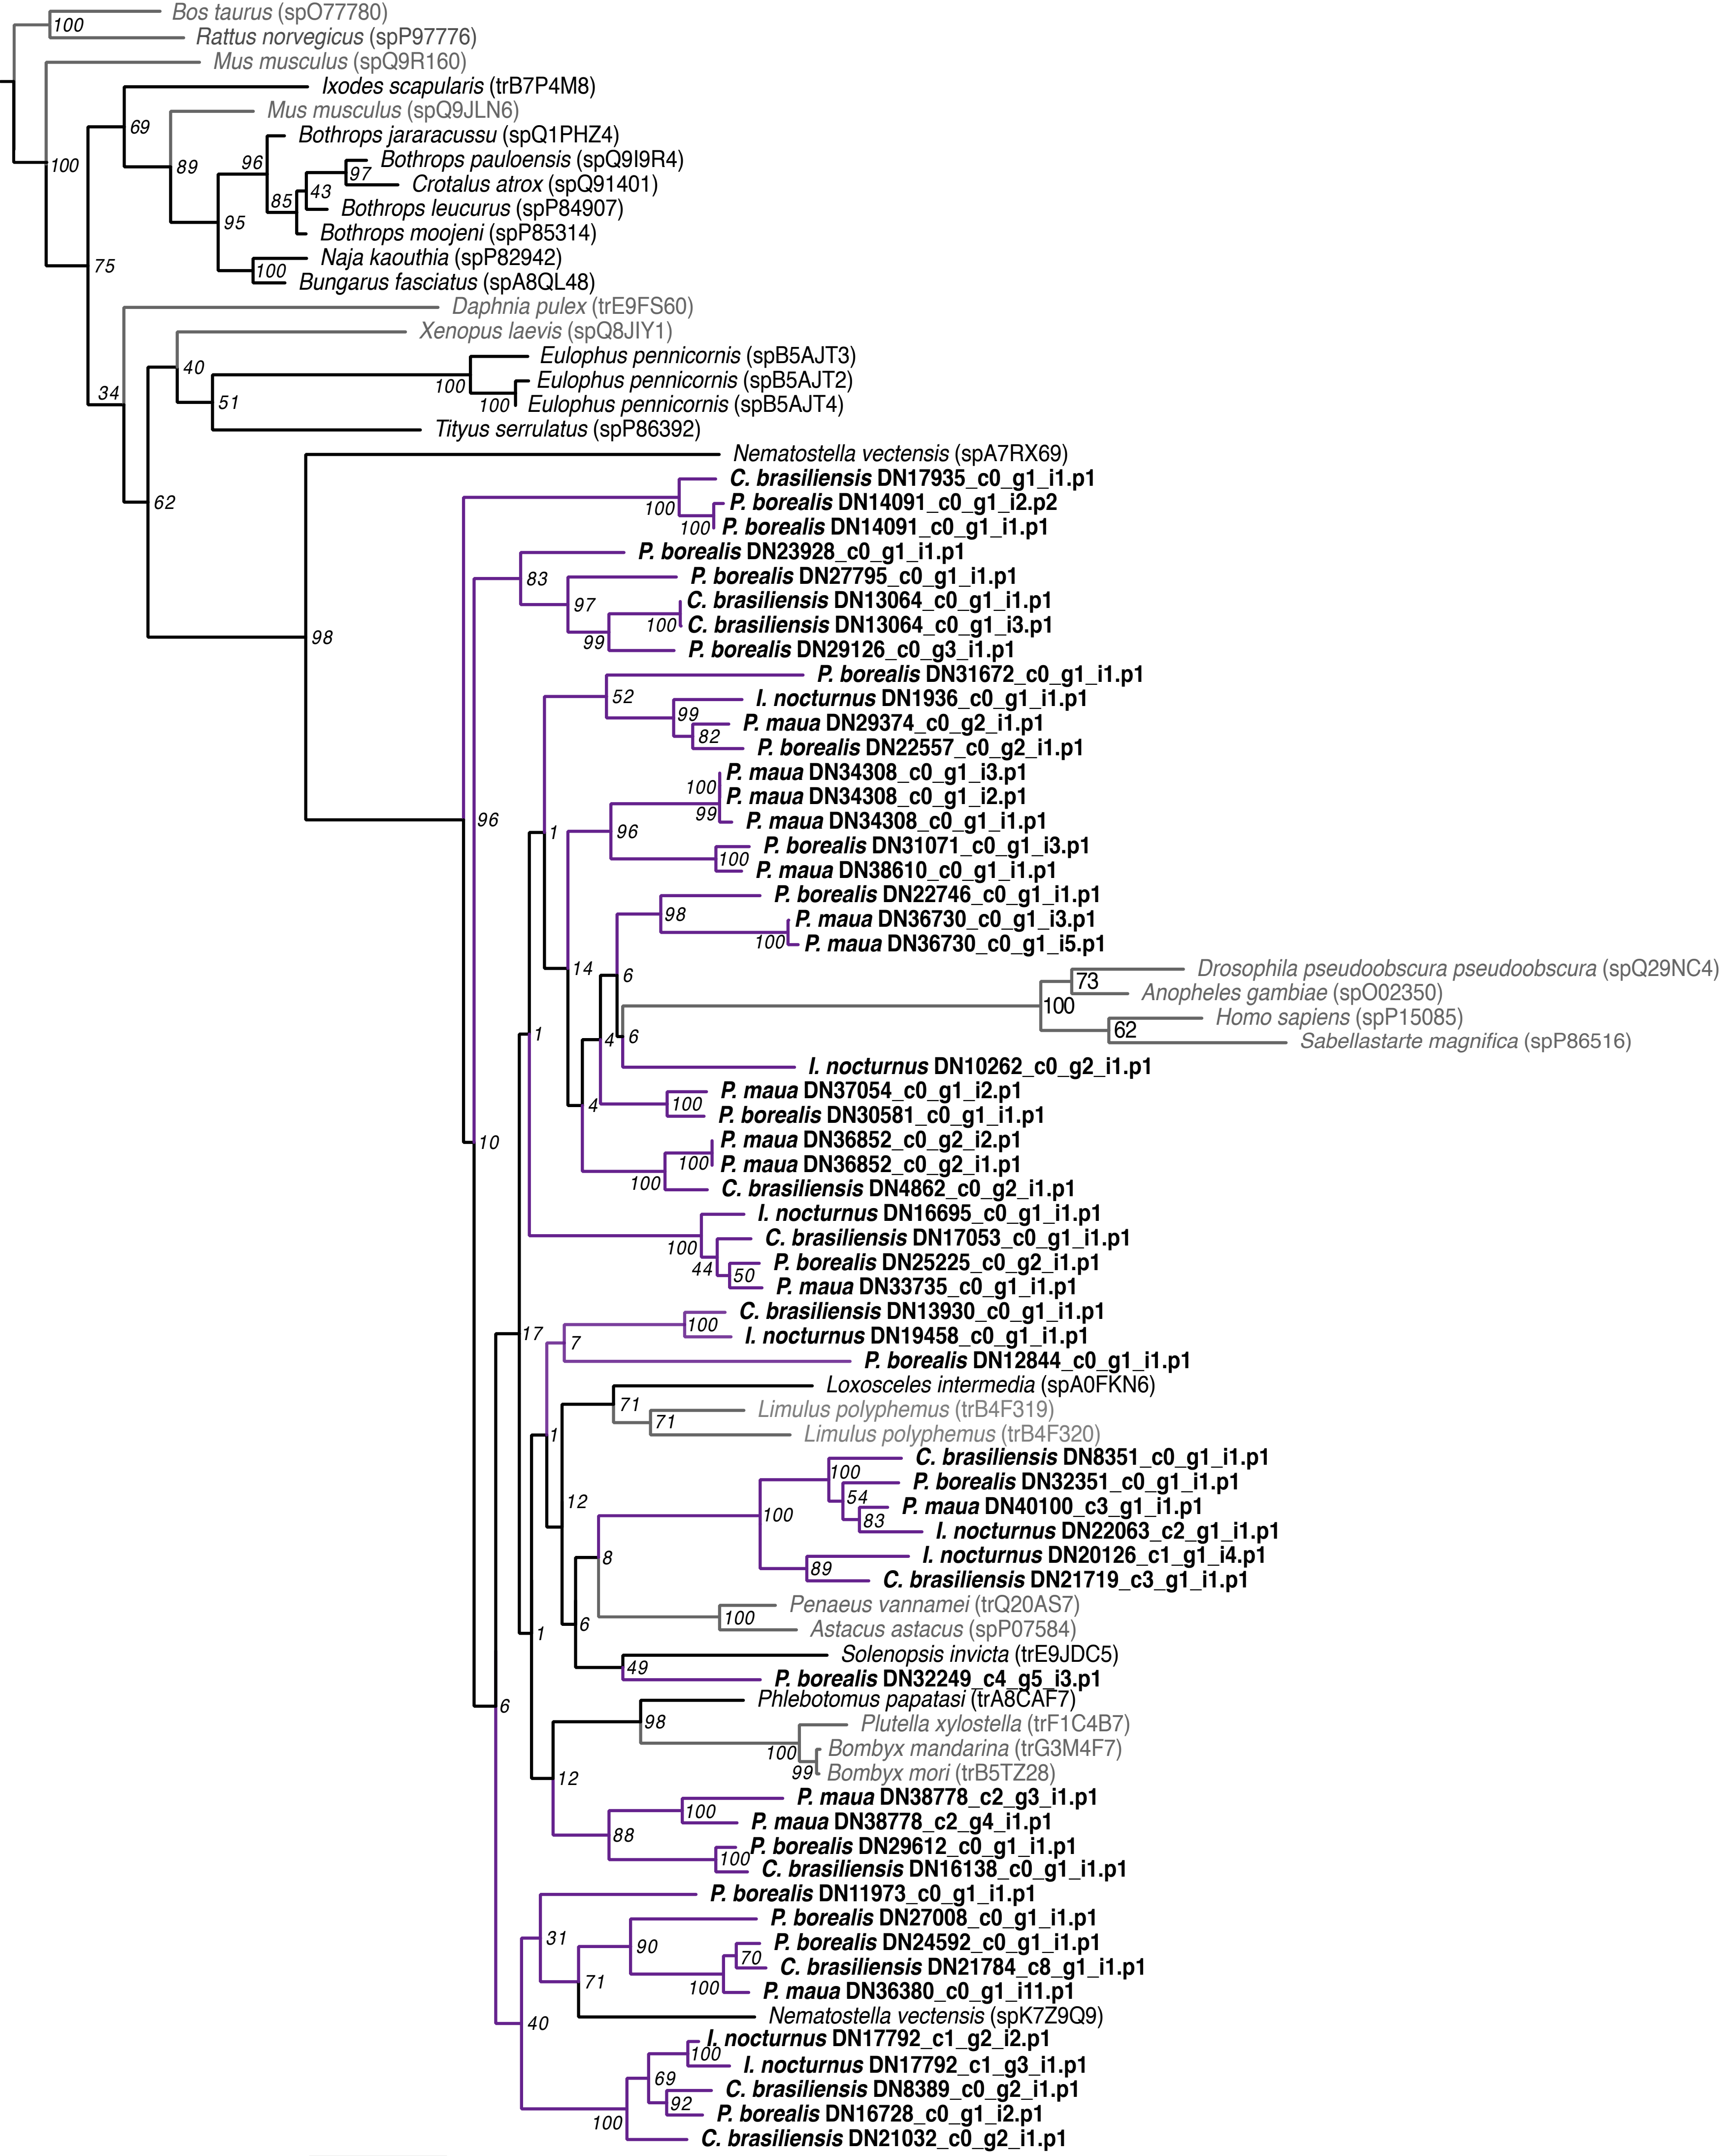

0.8

Supplement: s1 [file s1]

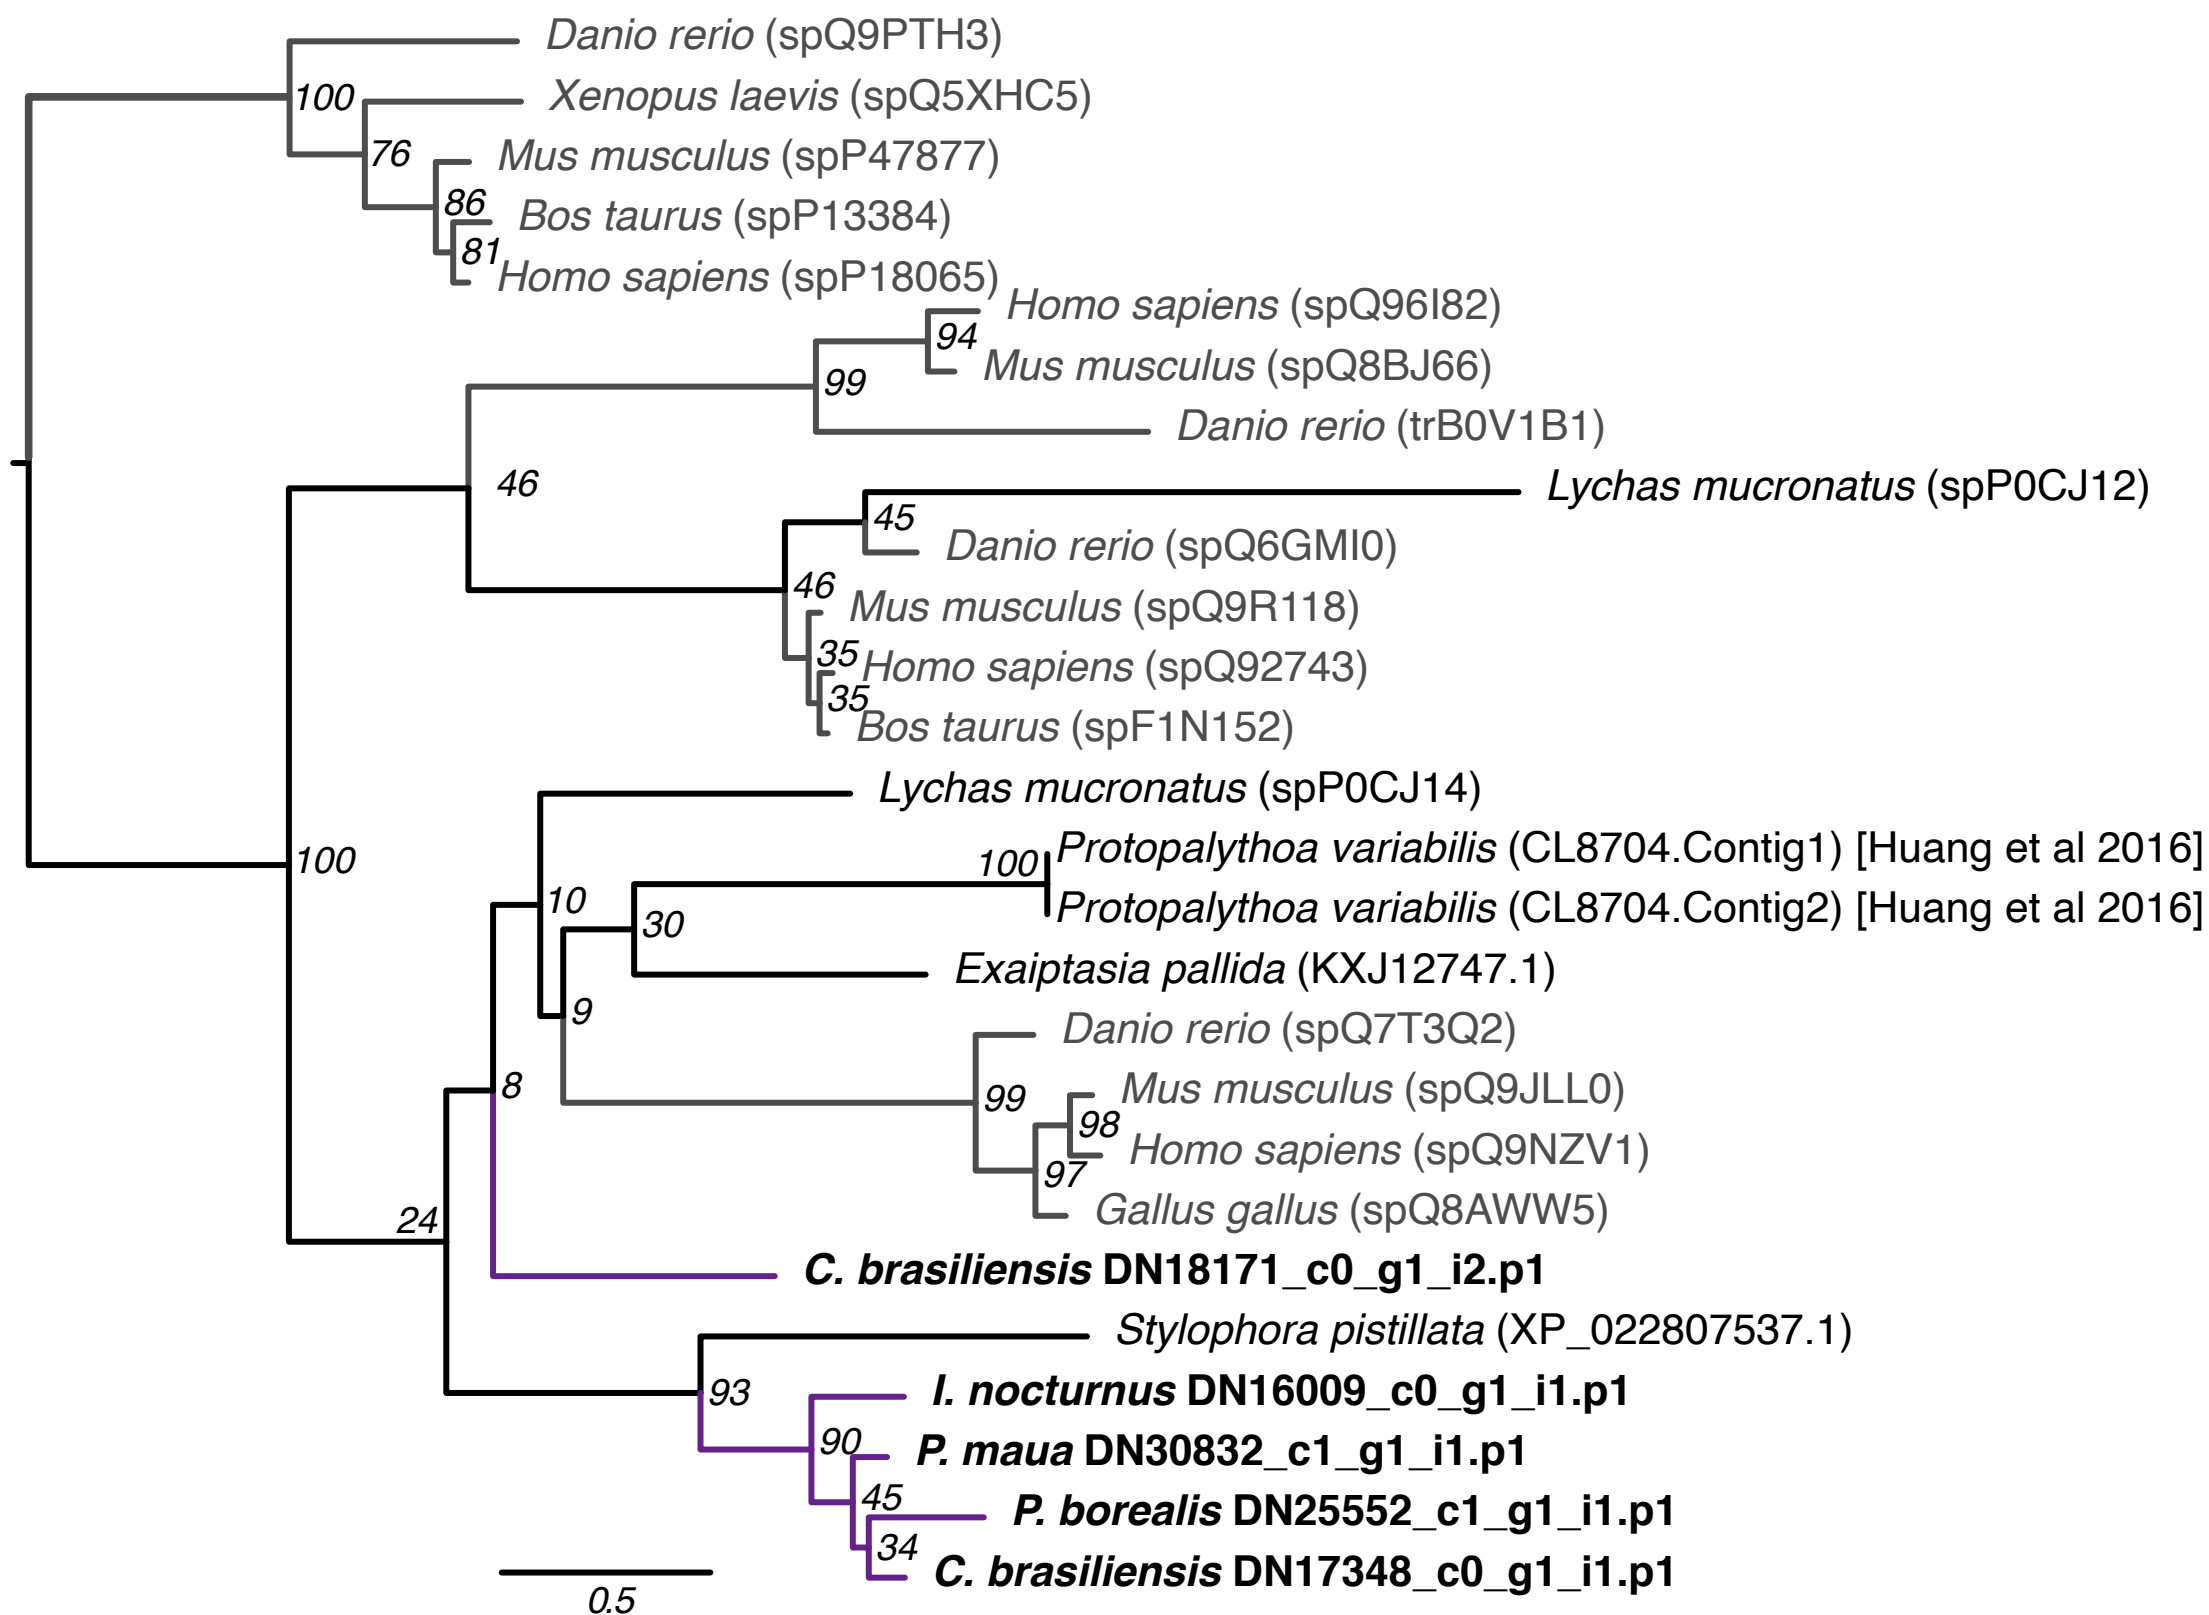

Supplement: s1 [file s1]

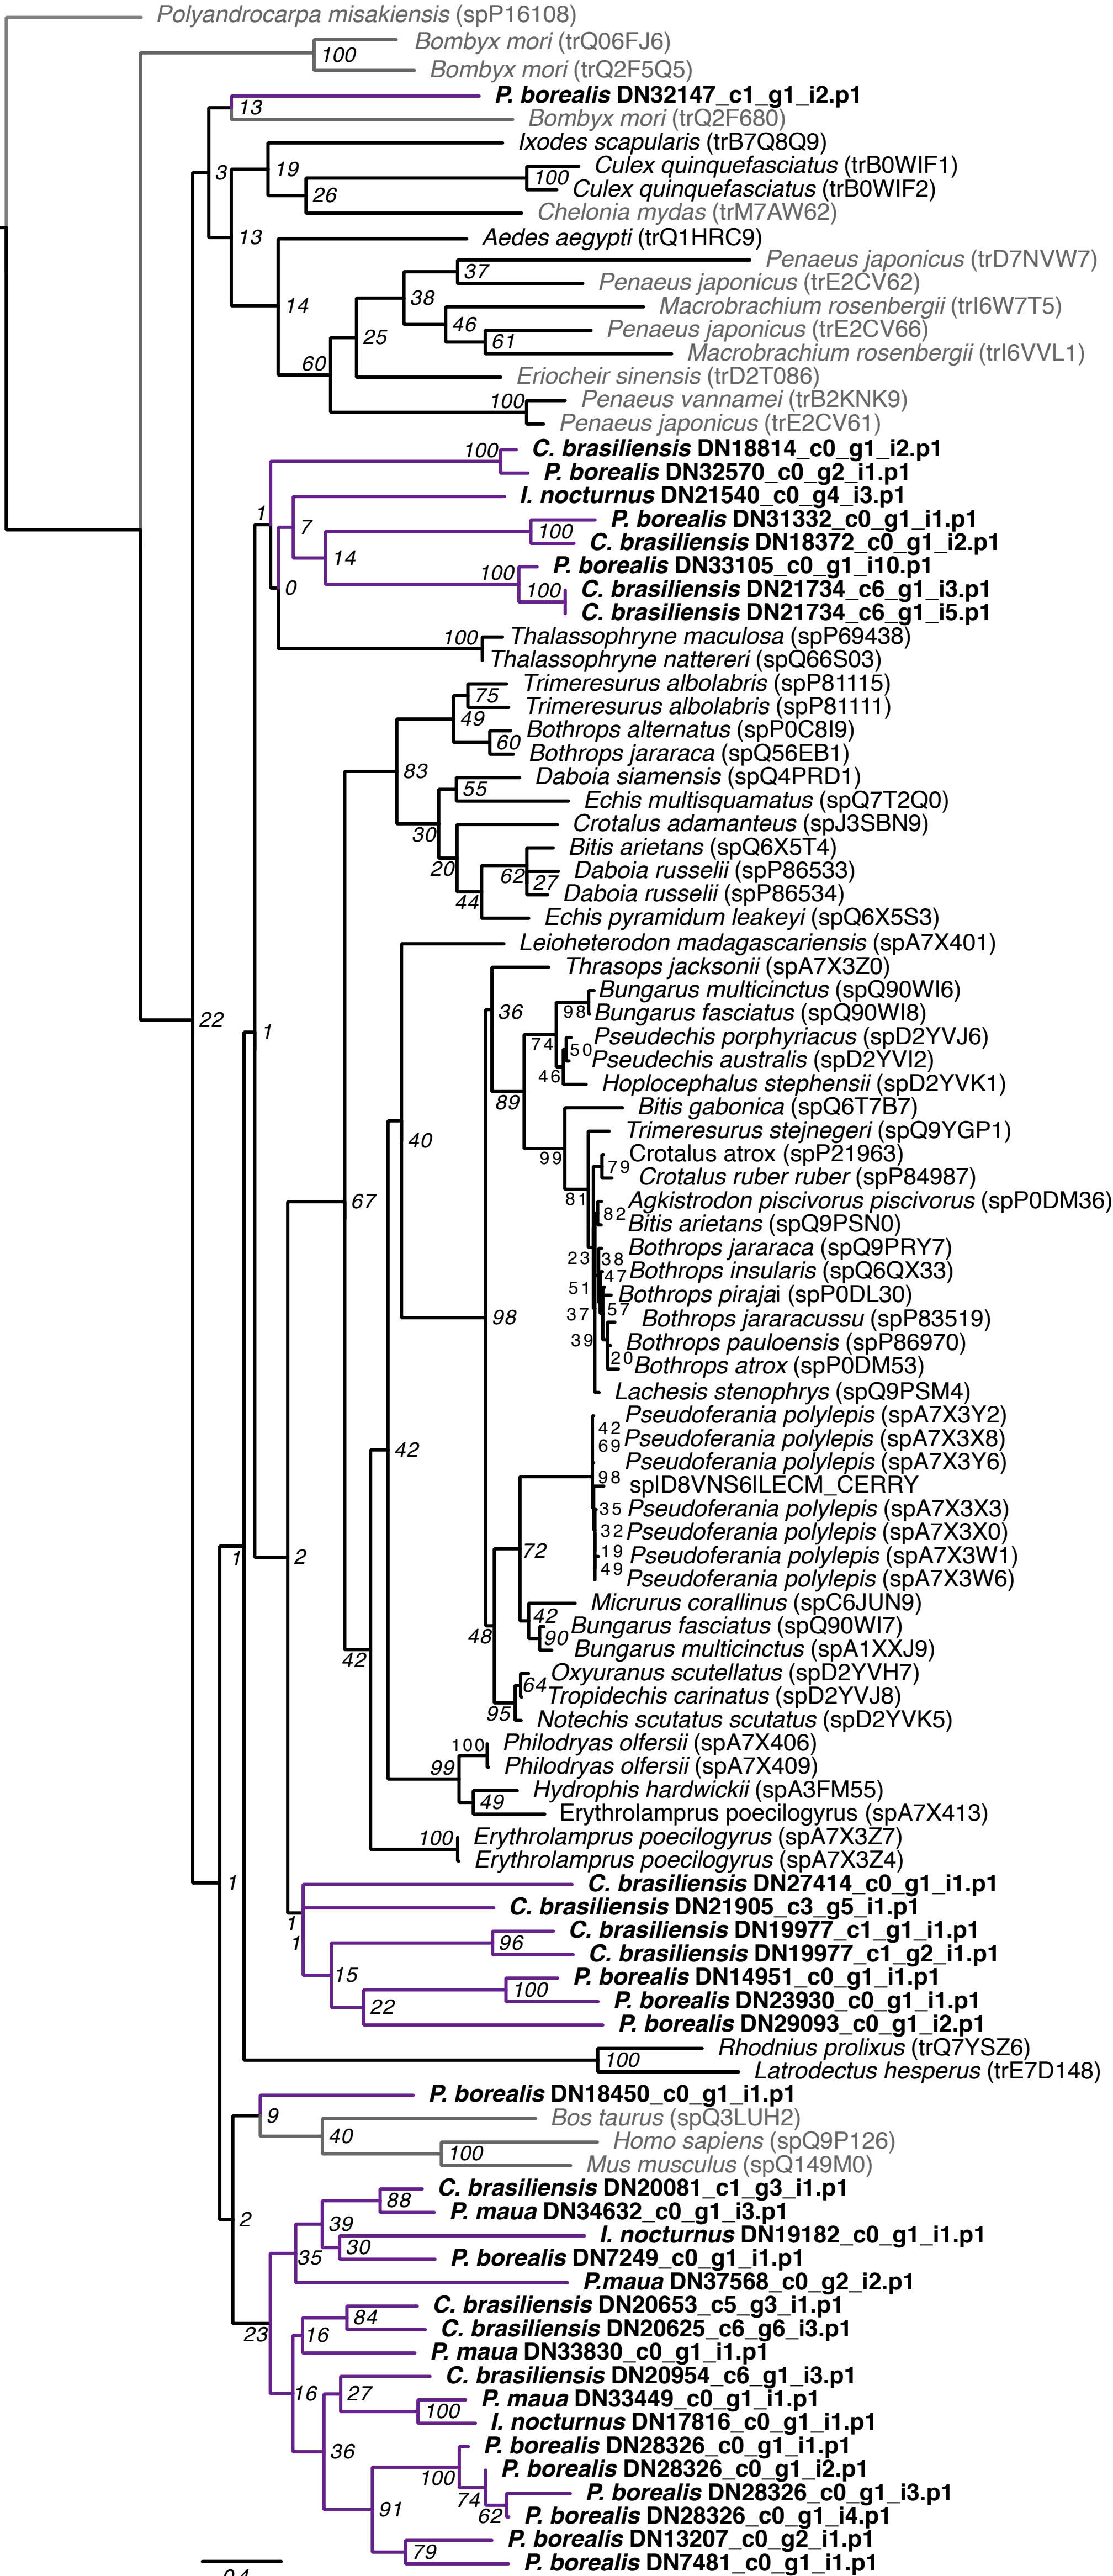

0.4

Supplement: s1 [file s1]

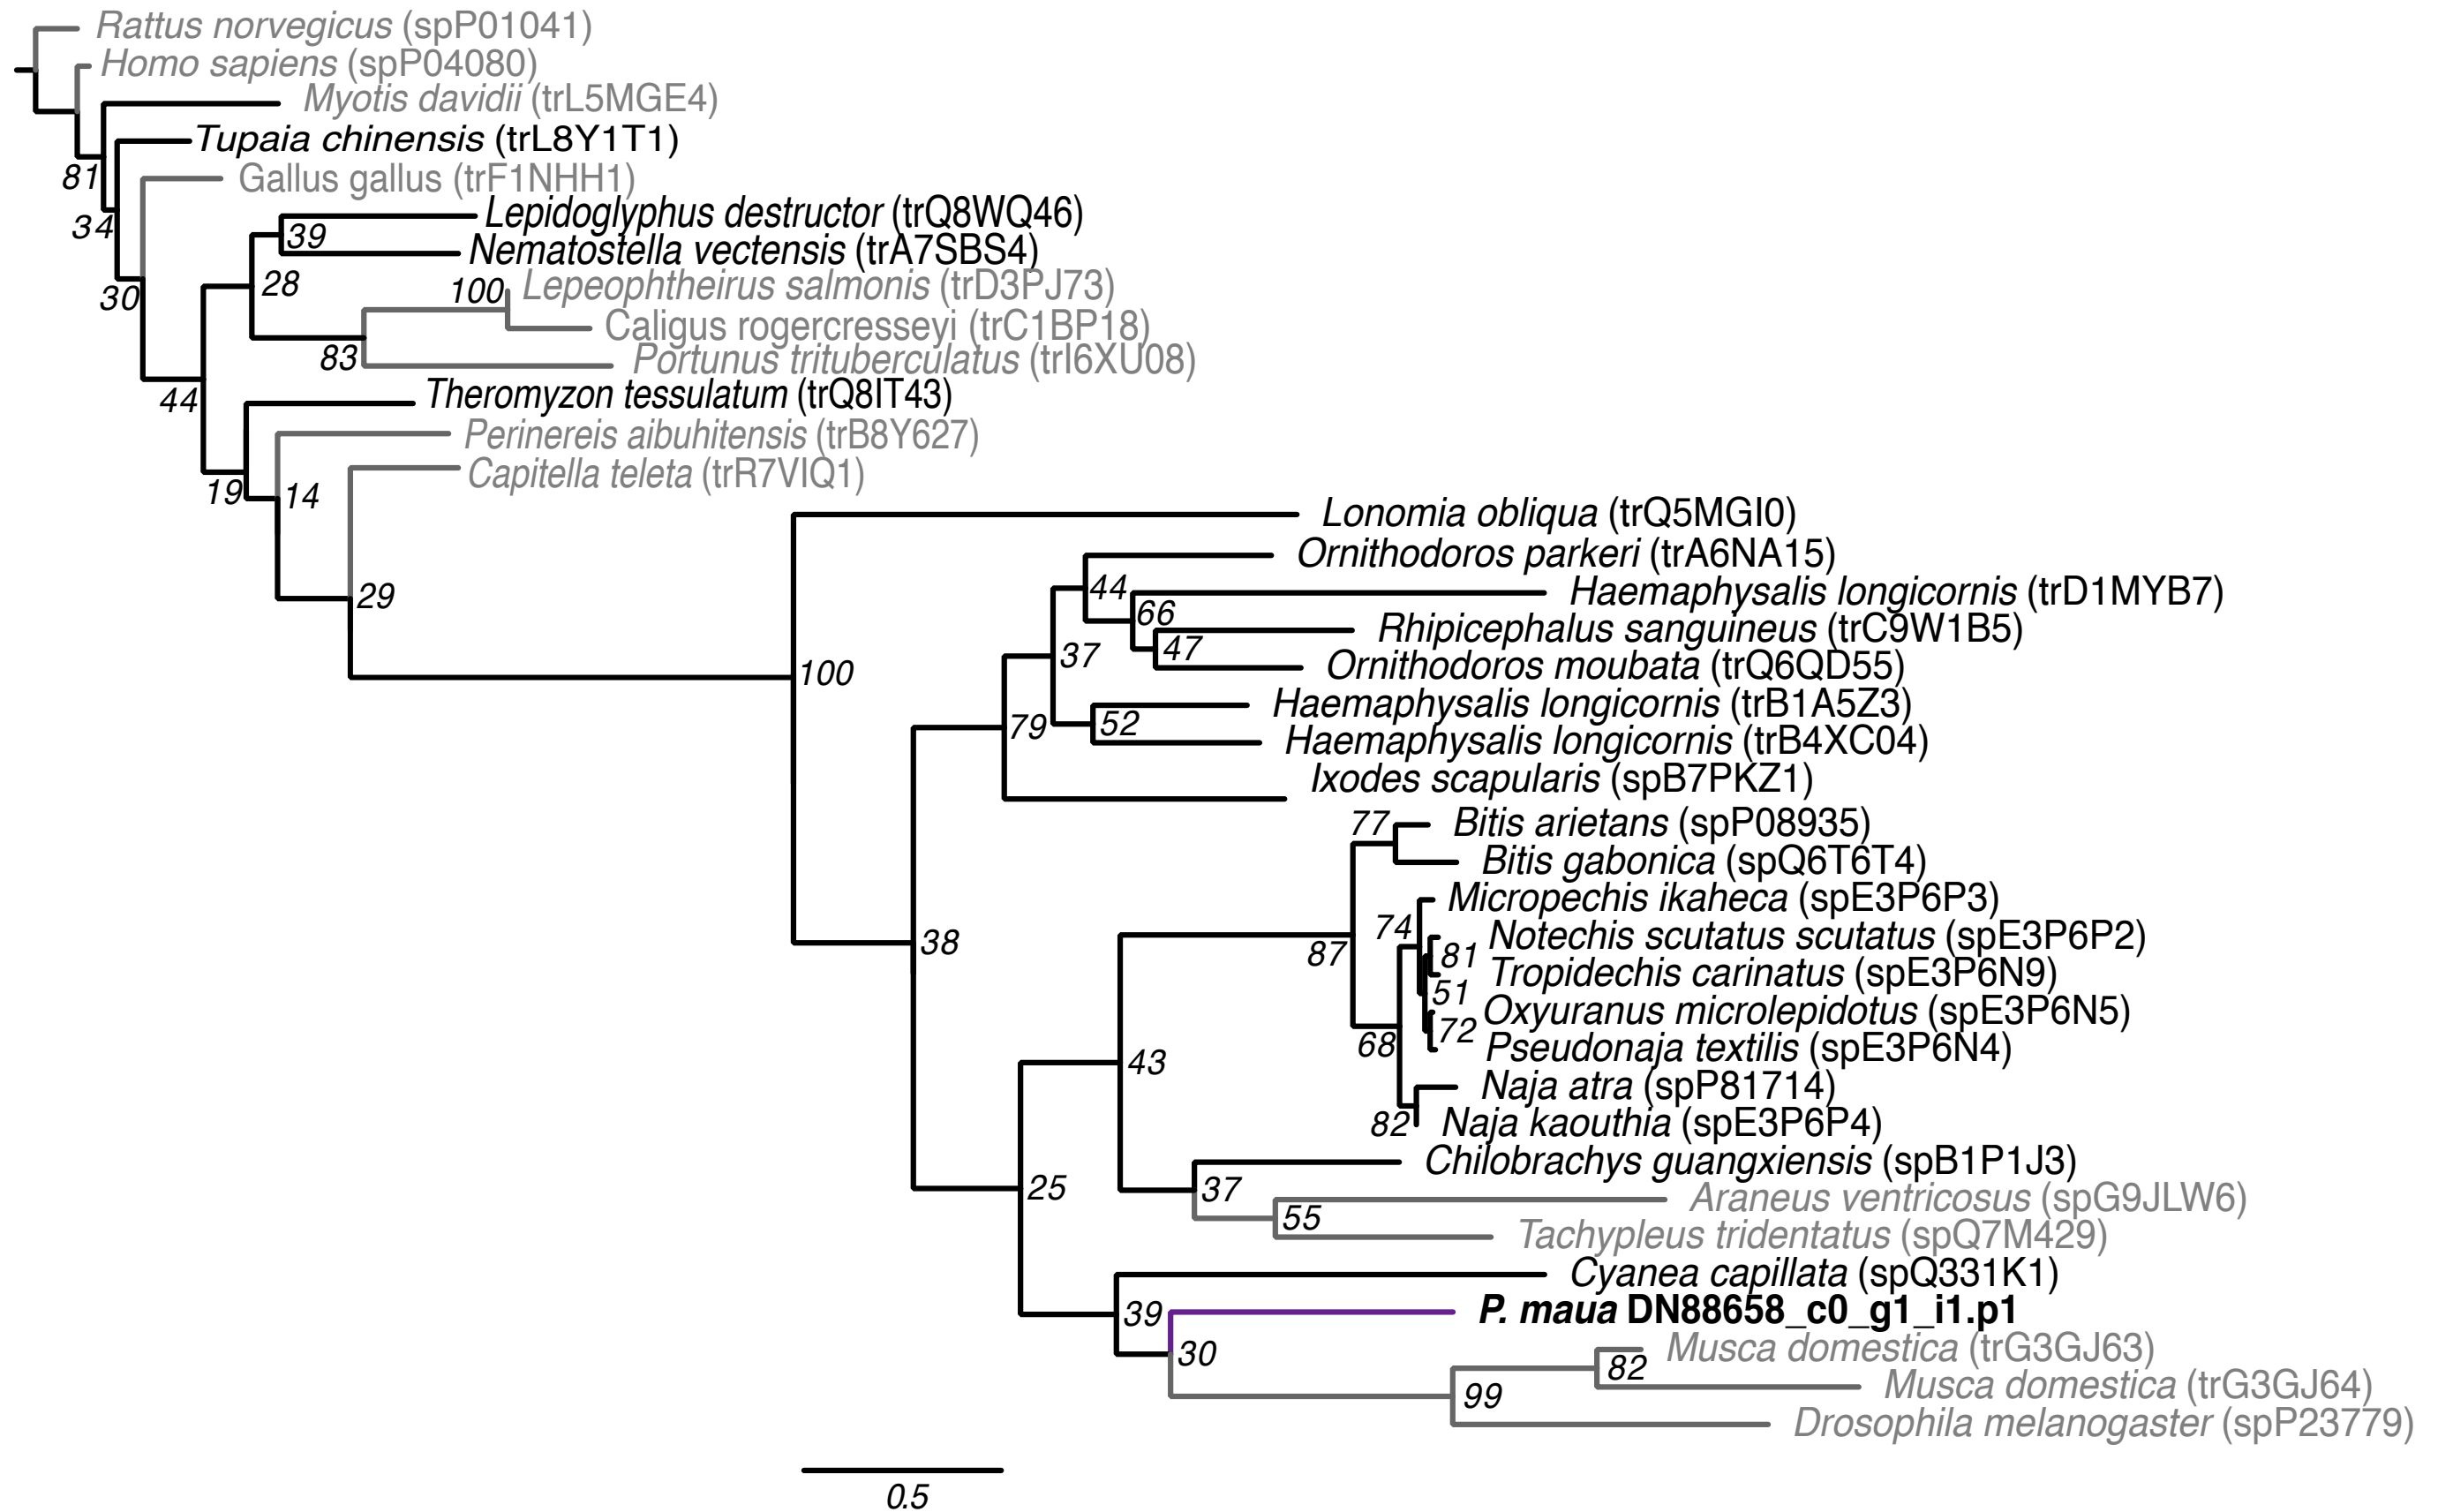

Supplement: s1 [file s1]

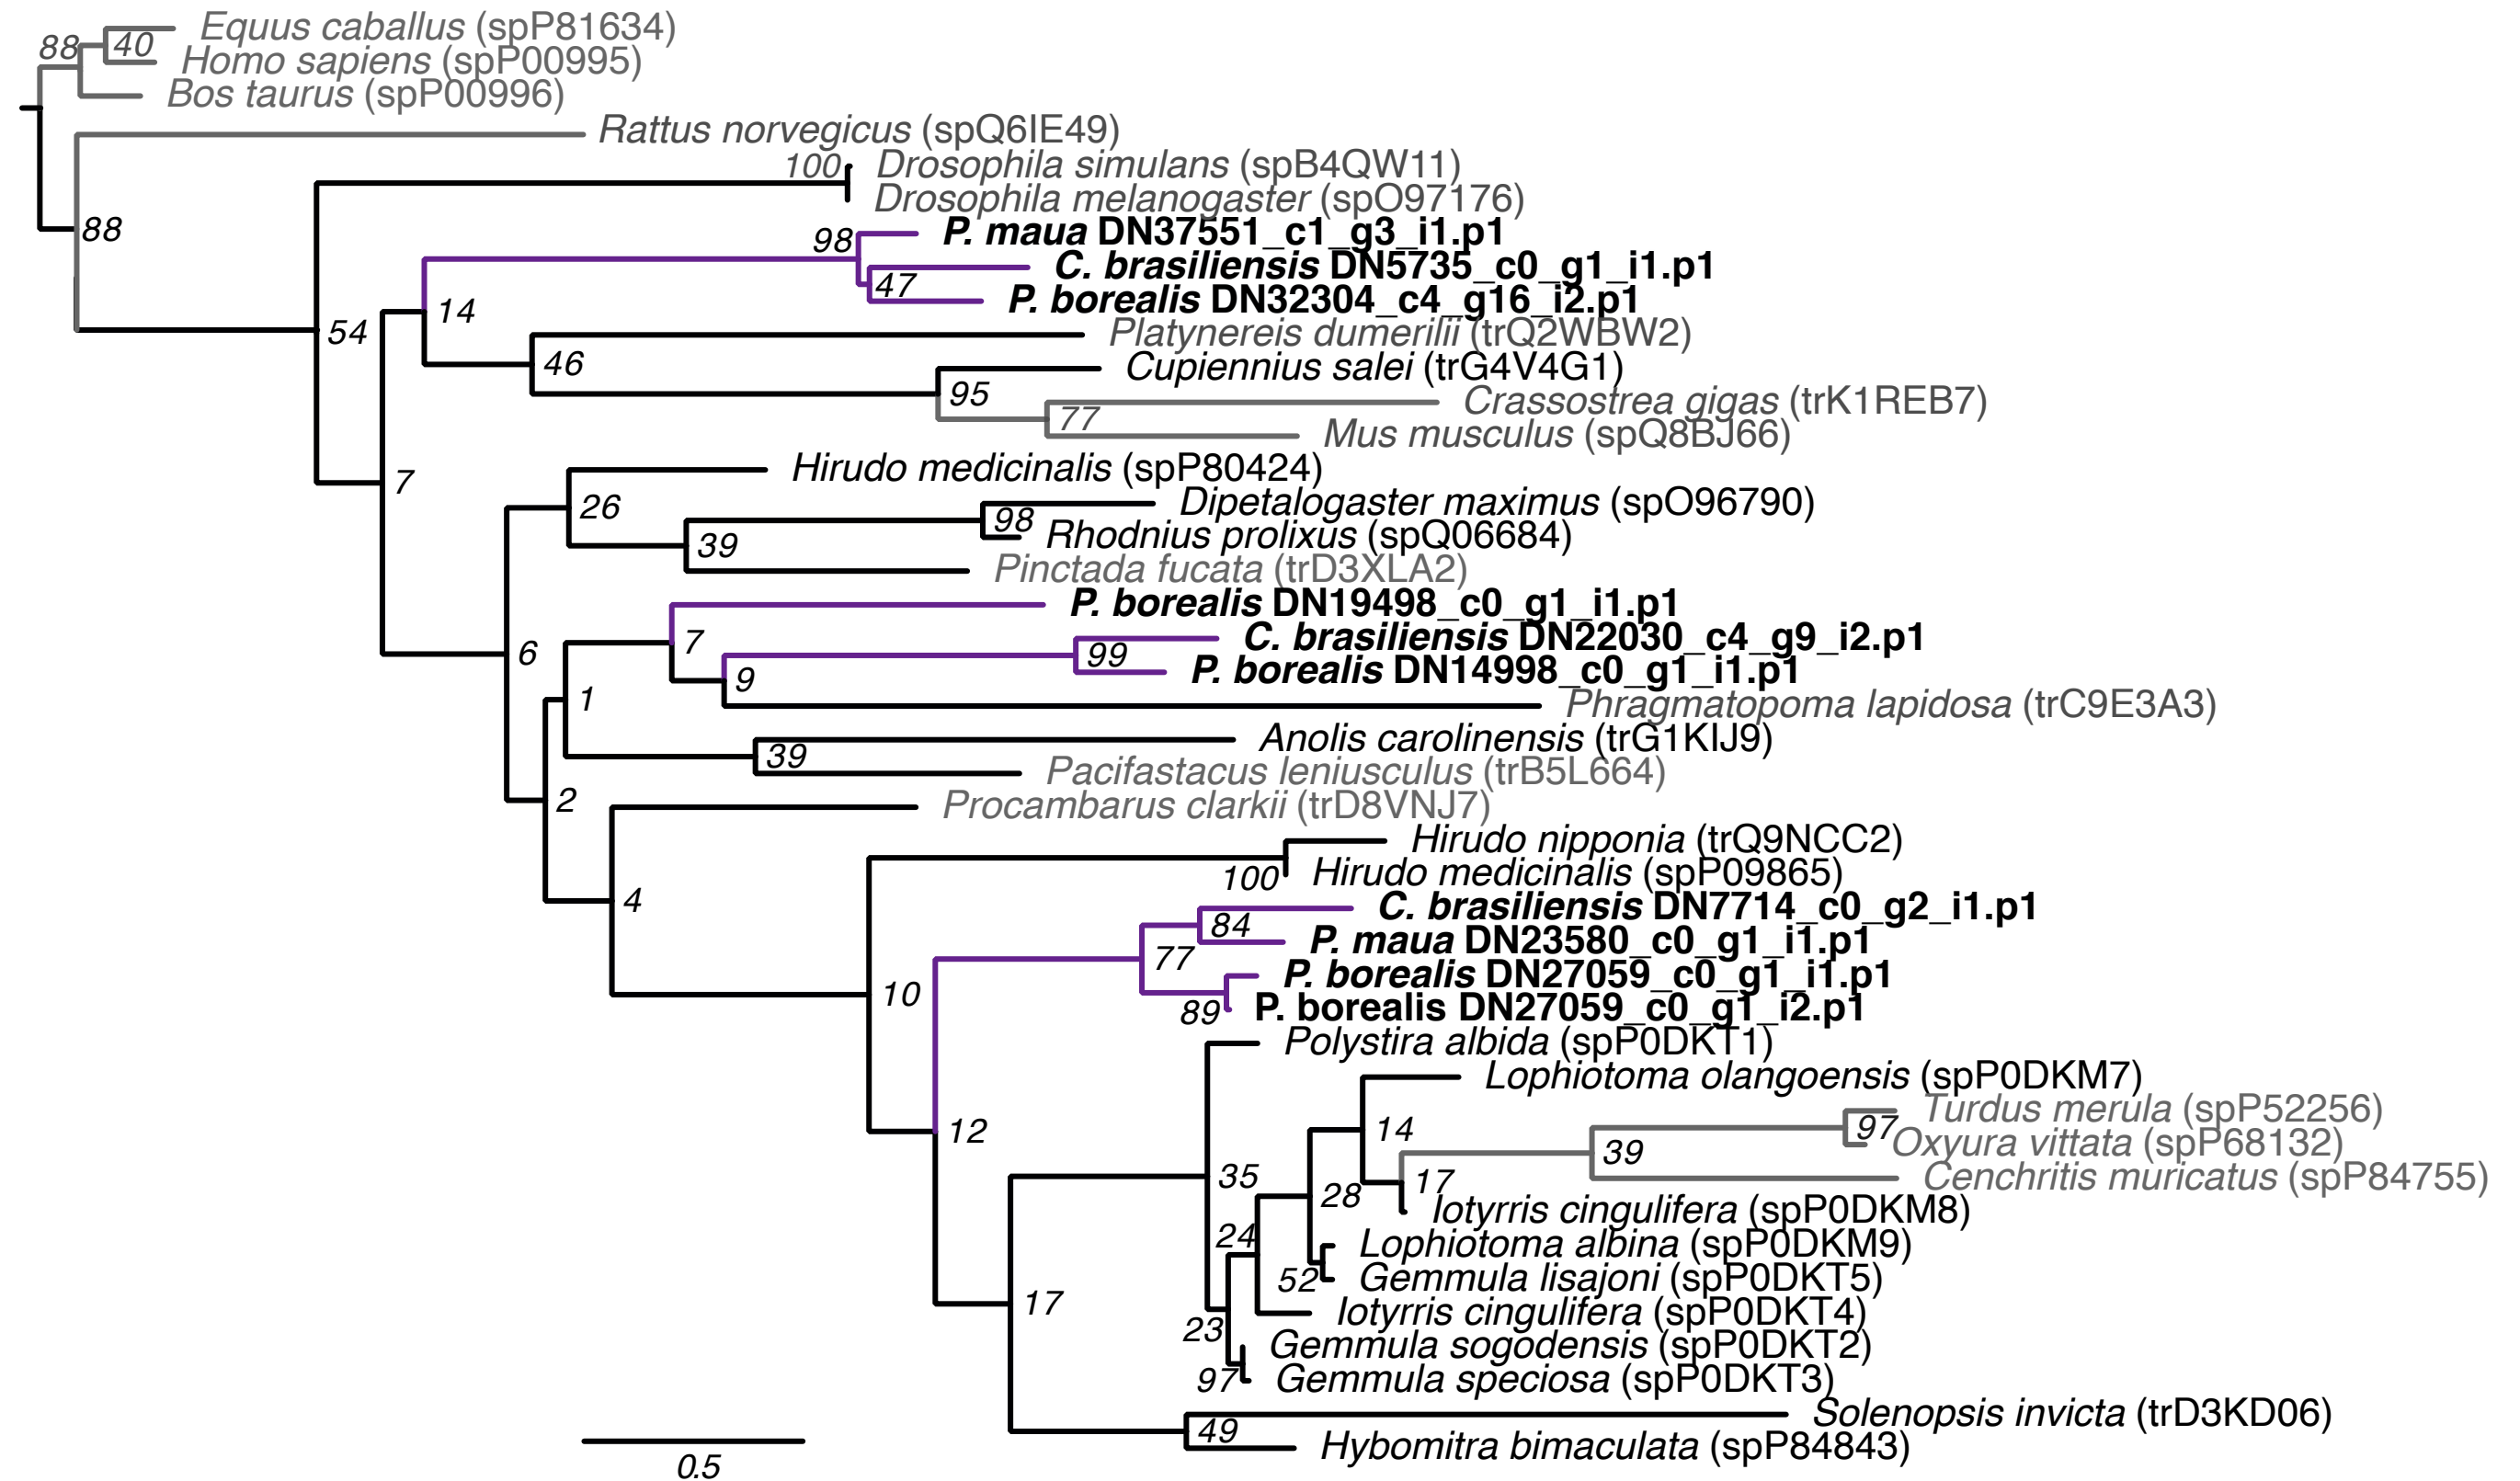

Supplement: s1 [file s1]
